# Supplementary material for: The WSTF-ISWI Chromatin Remodeling Complex Transiently Associates with the Human Inactive X Chromosome during Late S-Phase Prior to BRCA1 and γ-H2AX
Source: PubMed Central journal article supplement (PMC3498190; doi:10.1371/journal.pone.0050023), 2012-11-14
Supplement: pone.0050023.s001.pdf [file pone.0050023.s001.pdf]

## X chromosome BACs

| Pool   | BAC           | Start*     | Finish    | Genes                  |
|--------|---------------|------------|-----------|------------------------|
| 1      | RP11-102P23   | 80307324   | 80471160  | SH3BGRL                |
|        | RP11-73009    | 84981302   | 85164535  | CHM                    |
|        | RP11-471G13   | 94723861   | 94900251  | None                   |
|        | RP11-358K18   | 94891268   | 95033143  | None                   |
|        | RP11-402K9    | 99210925   | 99386056  | None                   |
|        | RP11-99E24    | 99373843   | 99554021  | PCDH19                 |
| 2      | RP11-643F6    | 99643781   | 99890275  | TNMD, TSPAN6 + SYTL4   |
|        | RP11-794023   | 100121535  | 100322783 | TRMT2B, TMEM35 + CENPI |
|        | RP11-192G13   | 100579944  | 100766192 | ARMCX4, ARMCX1 + ARMC6 |
|        | RP11-353J17   | 101454691  | 101642126 | NXF2B                  |
|        | RP11-398N9    | 102643087  | 102806818 | MORF4L2                |
|        | RP11-541I12   | 103373831  | 103557164 | ESX1                   |
|        | RP11-647M7    | 105695984  | 105872849 | CXORF57 + RNF128       |
|        | RP11-150F24   | 105832705  | 106002508 | RNF128 + TBC1D8B       |
| 3      | RP11-425O12   | 109203067  | 109404393 | AMMECR1                |
|        | RP11-12D18    | ~109140001 | 109290000 | TMEM164                |
|        | RP11-733H21   | 109968123  | 110073451 | PAK3                   |
|        | RP11-1066D24  | 111533817  | 111631587 | ZCCHC16                |
|        | RP11-485D13   | 113641141  | 113824886 | HTR2C                  |
| 4      | RP11-268A15   | 114639781  | 114792452 | PLS3                   |
|        | 2272M5        | 114        |           | DXZ4                   |
|        | RP11-761E20   | 114943586  | 115133311 | DXZ4 distal            |
|        | RP11-517D11   | 115089412  | 115231372 | AGTR2                  |
|        | RP11-27G9     | 115938027  | 116104434 | None                   |
|        | RP11-197B12   | 117211298  | 117315606 | None                   |
|        | ** RP11-423G5 | 117448177  | 117632053 | DOCK11                 |
| 5      | RP11-166C19   | 119        |           | CT47                   |
|        | RP11-100L19   | 122926111  | 123093111 | STAG2                  |
|        | RP11-13E5     | 124998007  | 125165297 | WDR40C                 |
|        | RP11-388O17   | 129        |           | SUHW3                  |
|        | RP11-754H22   | 130636029  | 130790513 | X130 array             |
| 6      | RP11-274K13   | 134872885  | 135024305 | MMGT1 + SLC9A6         |
|        | RP11-535K18   | 135051131  | 135233538 | FHL1, MAP7D3 + GPR112  |
|        | 82404         | 153        |           | H2A.Bbd & F8c          |
|        | 1047B3        | 153        |           | H2A.Bbd & F8c          |
|        | 968D14        | 154        |           | H2A.Bbd                |
|        | 999H8         | 154        |           | H2A.Bbd                |
| 905N17 | 154           |            | H2A.Bbd   |                        |
| 933C9  | 154           |            | H2A.Bbd   |                        |

\*Coordinates based on hg18. Precise start and finish base pairing given for those BACs that are sequenced.

Coordinates of non-sequenced BACs are based on FISH data and gene content.

\*\*DOCK11 containing BAC clone that frequently overlapped with WSTF enrichment at the Xi.
